# Supplementary material
Source: publisher figshare collection journal article supplement (https://frontiersin.figshare.com/ndownloader/files/32407166)
Supplement: Supplementary file 1 [file 32407166]

| Type of Assessment                                           | Source                         | Sample, Discipline                                 | N*                                     | Research Design                       | Area Codes                       | Source/Phase#               | Brief Summary of Findings                                                                                                                                                                                                                                                                                                                                                                                                                                                                                                                                                        |
|--------------------------------------------------------------|--------------------------------|----------------------------------------------------|----------------------------------------|---------------------------------------|----------------------------------|-----------------------------|----------------------------------------------------------------------------------------------------------------------------------------------------------------------------------------------------------------------------------------------------------------------------------------------------------------------------------------------------------------------------------------------------------------------------------------------------------------------------------------------------------------------------------------------------------------------------------|
| Feedback                                                     | Agricola et al. (2020)         | Undergraduate, health                              | 26/32/30/27                            | Experiment 2x2                        | Cognition & Motivation           | Teacher2                    | Verbal (as opposed to written) feedback did not improve students' self-efficacy or motivation but had an impact on perceptions of feedback (quality, usefulness, quantity, and timing), as compared to written feedback. Feedback request forms did not improve students' perceptions, self-efficacy, or motivation.                                                                                                                                                                                                                                                             |
| Post-exam review                                             | Andaya et al. (2017)           | Undergraduate, biology                             | 44                                     | Descriptive                           | Cognition                        | Self3,4                     | Relationship found between quality of students' post-exam reviews, including quality of reflections on reasons for their errors, and performance on exams. No evidence that simply completing first review led to improvements on next exam. A large percentage of students employed study strategies that relied heavily on the instructor (attend lectures, review worksheets); a small percentage used strategies that required more motivation and self-direction (self-testing); few valued these strategies.                                                               |
| Portfolio                                                    | Baas et al. (2019)             | Primary                                            | 419/117                                | Quasi-experiment                      | Motivation                       | Self4 & Teacher4            | Influence of portfolios on motivation were fully mediated by students' perceptions of AfL (scaffolding in particular, not monitoring). Students who used portfolios were less autonomously motivated than students who did not, but scaffolding predicted autonomous motivation.                                                                                                                                                                                                                                                                                                 |
| Self-assessment                                              | Bernacki et al. (2016)         | Secondary, science & physics                       | 26/27                                  | Quasi-experiment                      | Motivation                       | Self4                       | Students who wrote weekly self-assessments of their competency and interest in science lessons showed higher endorsement of mastery goals and reported greater situational interest in science topics after the intervention compared to students who wrote summaries of the lessons. Increases in situational interest predicted higher long-term interest in the domain. For the self-assessments, prompts that articulate goal development, mastery orientation, and focus on the features of mastery were important.                                                         |
| Goals, criteria, teacher, peer & self-feedback               | Braund & DeLuca (2018)         | Primary, science                                   | 44 Ts                                  | Survey & interview                    | Cognition                        | Self, Peer & Teacher1,2,3,4 | Teachers viewed all assessment as a vehicle to promote metacognition and SR. Dialogic, self- and peer assessment were perceived as giving students greater agency and ownership of their learning goals, strategies, and plans.                                                                                                                                                                                                                                                                                                                                                  |
| Feedback                                                     | Brown et al. (2016)            | Undergraduate, learning theory                     | 278                                    | Survey                                | Cognition & Motivation           | Teacher & Peer2             | Students' conceptions of feedback predicted SRL, self-efficacy, and GPA.                                                                                                                                                                                                                                                                                                                                                                                                                                                                                                         |
| Formative feedback                                           | Çakir et al. (2016)            | Undergraduate                                      | 205                                    | Survey                                | Cognition                        | Teacher2                    | No effect of level of SRL skills (low to high) on preferences for formative feedback.                                                                                                                                                                                                                                                                                                                                                                                                                                                                                            |
| Feedback on exam                                             | Callender et al. (2016)        | Undergraduate, decision-making                     | 41/49                                  | Quasi-experiment                      | Cognition                        | Self2 & Teacher2            | Students who received item-level feedback improved their metacognitive accuracy across exams as compared to those that did not receive feedback.                                                                                                                                                                                                                                                                                                                                                                                                                                 |
| Feedback                                                     | Carless (2019)                 | Undergraduate, teacher prep                        | 4                                      | Longitudinal interview                | Cognition, Motivation & Behavior | Self1,2,3,4 & Teacher2      | Regarding feedback uptake, students reported failing to engage with end-of-semester comments because there was no opportunity to use the feedback; short-term uptake within two-assignment modules; long-term efforts at improving learning strategies.                                                                                                                                                                                                                                                                                                                          |
| Peer review                                                  | Chaktsiris & Southworth (2019) | Undergraduate, history                             | 30                                     | Survey & interview                    | Cognition, Motivation, Behavior  | Teacher 2 & Peer 2          | The benefits of a scaffolded writing model that includes peer review led to little revision of student work from draft to final paper; however, students found the process useful. The peer review process helped students develop non-cognitive skills: self-discipline that helped with time management; and resilience in overcoming anxiety, which helped them to integrate into a social network.                                                                                                                                                                           |
| Feedback                                                     | Cheah & Li (2020)              | Undergraduate, business                            | 16/12                                  | Quasi-experiment                      | Cognition & Motivation           | Teacher2                    | Positive association between company supervisors' feedback using a structured feedback form (compared with unstructured feedback) and student performance on individual presentations and group reports. Students' positive attitudes toward feedback and perceived usefulness of supervisor's structured feedback were positively related to group report performance.                                                                                                                                                                                                          |
| Peer assessment                                              | Chien et al. (2020)            | High school, English                               | 33/36                                  | Quasi-experiment                      | Cognition & Motivation           | Teacher2, Peer2             | Peer assessment group had higher English speaking performance, learning motivation, and critical thinking skills, and lower learning anxiety. Four types of peer comments were identified: Praise, Criticism, Opinion (constructive suggestions), and Irrelevant. Praise was positively related to students' English-speaking performance; the relationship with Criticism was negative. Irrelevant feedback was not significantly correlated with the students' performance in the earlier peer assessment stage but had a significantly negative correlation at a later stage. |
| Peer assessment                                              | Cho (2019)                     | Undergraduate, writing                             | Non-traditional :145; Traditional: 121 | Quasi-experiment                      | Motivation                       | Self2,3                     | Traditional college students were less likely to write another essay if they had previously evaluated exemplary essays (purportedly by peers) relative to poorly-written essays, replicating the discouragement-by-exposure-to-peer-excellence effect. However, the effect was absent among nontraditional college students.                                                                                                                                                                                                                                                     |
| Meta-learning tasks                                          | Colthorpe et al. (2018)        | Undergraduate, biomedical science                  | 246                                    | Qualitative, survey, t-test           | Cognition                        | Self1,4                     | Most students reported meta-learning tasks (reflect, set goals, manage motivation and strategy use, etc.) positively impacted study. Three said the tasks enabled indirect feedback to instructors. Students were equally likely to report changing or not changing study strategies in subsequent semesters. Students that did not change were generally high achievers but their performance did not improve across semesters. Students who changed did less well overall but significantly improved performance across semesters.                                             |
| Feedback                                                     | Crimmins et al. (2016)         | Undergraduate, writing                             | 12 Ts; 258 Ss                          | Surveys & focus group                 | Cognition & Motivation           | Teacher2                    | Students valued the combination of written, reflective and dialogic assessment feedback; felt it enhanced relationships with teachers and peers; would seek teacher feedback in future. Teachers reported face-to-face feedback enhanced communication, relationships, and student understanding of written feedback; provided feedback for teachers.                                                                                                                                                                                                                            |
| Final Term Exam Exemption Policy                             | David et al. (2018)            | Undergraduate, Marine Engineering & Transportation | 439                                    | Case study                            | Motivation                       | Self1                       | A final examination exemption policy aimed to motivate Maritime Academy students to strive harder. The policy resulted in the improvement of learning strategies used by students. Third-class (2nd-year) students had statistically significant improvement compared with fourth-class (1st-year) cadets in terms of effort regulation and help seeking strategies. Interviews showed the policy motivated students to study harder. A few students reported disadvantages such as anxiety or low morale among students who did not meet the standards of the policy.           |
| Peer assessment                                              | Dolezal et al. (2018)          | High school, computer science                      | 57                                     | Survey                                | Motivation                       | Peer2                       | Two peer reviewed exercises were rated distinctly more motivating than the average of the other eleven exercises only assessed by the teacher. Students also reported improvement in feedback quantity and timing for the peer reviewed exercises. Students reported wanting approximately half of their exercises to be peer assessed, and also liked feedback from teacher. Ratings of one of the exercises in one class were influenced by 3 students who said they experienced an unfair deduction of points.                                                                |
| Portfolio                                                    | Farahian & Avarzamani (2018)   | Undergraduate, EFL                                 | 38/31                                  | Experiment                            | Cognition                        | Self, Peer & Teacher2,3,4   | Portfolios contributed to person and strategic metacognitive awareness, writing proficiency, and positive views of formative assessment, teacher/peer feedback, and reflecting on and revising drafts.                                                                                                                                                                                                                                                                                                                                                                           |
| Learning intentions, criteria, goal-setting, self-assessment | Fletcher (2016)                | Primary, writing                                   | 7 T; 126 Ss                            | Qualitative                           | Motivation                       | Self 1,2,3,4                | AaL processes, including student choice, facilitated self-efficacy, perception of control in assessment process, intrinsic and extrinsic motivation, ownership and pride. Students identified as low-achieving and/or with poor motivation were perceived by teachers as exceeding expectations by demonstrating relatively greater motivation, persistence, effort and pride.                                                                                                                                                                                                   |
| Learning intentions, criteria, goal-setting, self-assessment | Fletcher (2018)                | Primary, writing                                   | 10 T; 256 Ss                           | Qualitative                           | Cognition & Behavior             | Self 1,2,3,4                | A planning template supported student forethought, aided engagement in metacognitive processes such as monitoring understanding, organizing ideas, and checking for consistency. Also prompted students to seek help when they were receptive to feedback.                                                                                                                                                                                                                                                                                                                       |
| Optional electronic quizzes                                  | Foerster et al. (2018)         | Higher ed, statistics                              | 762                                    | Descriptive                           | Cognition                        | Tech2                       | Male students participated less in optional electronic quizzes. Students with greater prior knowledge participated more. Participation correlated positively with final grade for all groups. High-performing and female students participated more often but the relationship of quiz participation and course grade for high-performing and female students was lower than for male and low-performing students.                                                                                                                                                               |
| Co-created rubrics                                           | Fraile et al. (2017)           | Undergraduate, sport science                       | 34/31                                  | Quasi-experiment, think aloud, survey | Cognition                        | Self1,2, Peer1 & Teacher1   | Students who co-created rubrics outperformed the comparison group on one of three tasks.Think aloud protocols (but not self-report questionnaires) showed significant differences benefiting the treatment in 2/5 of the regulatory actions categories (self-regulatory propositions and need for clarification re rubric). Differences in self-efficacy approached significance. Students who experienced co-creation gave it higher importance.                                                                                                                                |

|                                                 |                               |                                     |                      |                                                                     |                                  |                             |                                                                                                                                                                                                                                                                                                                                                                                                                                                                                                                                                                                                                                                                                                                                                                                        |
|-------------------------------------------------|-------------------------------|-------------------------------------|----------------------|---------------------------------------------------------------------|----------------------------------|-----------------------------|----------------------------------------------------------------------------------------------------------------------------------------------------------------------------------------------------------------------------------------------------------------------------------------------------------------------------------------------------------------------------------------------------------------------------------------------------------------------------------------------------------------------------------------------------------------------------------------------------------------------------------------------------------------------------------------------------------------------------------------------------------------------------------------|
| Formative assessment                            | Fukuda et al. (2020)          | High school, English                | 118                  | Survey                                                              | Cognition, Motivation & Behavior | Self2,3, Teach1,            | Most participants experienced FA practices in secondary schools but these experiences did not lead to the development of SRL skills in out-of-class study time. There was a positive correlation between FA and SRL skills. Participants' experienced scaffolding that showed where they needed improvement but then seemed unable to monitor learning progress. For the participants whose teacher assisted in making a study plan, the mean for scaffolding was higher compared to monitoring. Participants' effort was relatively high but planning, monitoring, and strategy use were fairly low. Participants reported their teachers supported learning mostly with extra assignments or tests, not implementation of interactive FA intended to inform instruction or learning. |
| Self-, peer, teacher assessment                 | Gan et al. (2019)             | High school, EFL                    | 196                  | Survey                                                              | Motivation                       | Self & Peer & Teacher, 2    | Teacher-student interactive-informal assessment and student peer and self-assessment were best predictors of intrinsic motivation and positive attitudes toward the course, respectively. There was also a significant effect for school type (urban/rural). All dimensions of assessment practices were positively correlated with intrinsic motivation and attitudes toward the EFL course. Teacher monitoring positively predicted EFL-classroom anxiety and lack of confidence.                                                                                                                                                                                                                                                                                                    |
| Self-assessment                                 | Gašević et al. (2017)         | Undergraduate, performing art       | 77                   | Quasi-experiment                                                    | Cognition, Motivation, Behavior  | Self2                       | Students used the video annotation software CLAS for course-based self-assessment. Results confirmed that scaffolding (e.g., graded activity with instructional feedback) was required to guide initial tool use, although scaffolding did not have an independent significant effect on quantity of tool use. Use of the tool was strongly influenced by experience: students sustained their use of the learning tool in future courses even when it was not graded nor was feedback provided. Students' tool use is shaped by grading, feedback, and experience.                                                                                                                                                                                                                    |
| Post-exam review: Exam wrappers                 | Gezer-Templeton et al. (2017) | Undergraduate, science              | 73                   | Quasi-experiment, no control                                        | Cognition, Motivation & Behavior | Self1,3,4                   | Students were able to make and implement goals to improve study strategies, motivated by score improvements. There was a modest relationship between use of study strategies and performance.                                                                                                                                                                                                                                                                                                                                                                                                                                                                                                                                                                                          |
| Feedback                                        | Ghahari, & Sedaghat (2018)    | Undergraduate, writing              | 338                  | Survey, verbal protocol, demographic checklist, and group interview | Motivation                       | Peer2                       | Data collected before and after instruction that included peer feedback. Relatively conservative(e.g., desire for some of the errors to be corrected), dependent (e.g., tendency towards cooperative follow-up assignments), and restrictive (e.g., perceived superiority of language errors) views at early stages were gradually superseded with more confident (e.g., call for receiving hints), democratic (e.g., demanding feedback on content errors), and autonomous (e.g., preference for solo post-feedback activities) inclinations. Students reported deeper understanding of peer activities and higher self-regulation post-treatment.                                                                                                                                    |
| Peer feedback                                   | Gikandi & Morrow (2016)       | Online teacher prep                 | 16                   | Case study                                                          | Cognition                        | Peer2,3                     | Asynchronous discussions enabled reviewing others' thinking and composing ideas to offer feedback. Assessment guidelines and rubrics supported monitoring of peers' understandings and progress.                                                                                                                                                                                                                                                                                                                                                                                                                                                                                                                                                                                       |
| Feedback                                        | Guo & Wei (2019)              | Secondary mathematics               | 584                  | Survey                                                              | Cognition & Motivation           | Teacher2                    | Scaffolding and praise predicted greater metacognitive awareness, use of resource management strategies, intrinsic motivation, and self-efficacy. Verification and directive feedback predicted less use of organizational strategies but slightly more metacognitive awareness. Criticism predicted test anxiety.                                                                                                                                                                                                                                                                                                                                                                                                                                                                     |
| Feedback                                        | Guo et al. (2019)             | Secondary mathematics               | 1282                 | Survey                                                              | Cognition & Motivation           | Teacher2                    | Feedback, students' SRL, and their relationships differed between high- and low-achieving schools. At the high-achieving school, only verification and praise were positively related to SRL; at the low-achieving school, scaffolding, praise, and criticism was positively associated with SRL. At both schools, directive feedback was negatively related to SRL but more so at the low-achieving school.                                                                                                                                                                                                                                                                                                                                                                           |
| Classroom assessment                            | Harris et al. (2018)          | Primary/secondary & undergraduate   | 46 & 108             | Focus groups & interviews                                           | Cognition, Motivation & Behavior | Self, Peer, Teacher 1,2,3,4 | Students reported maladaptive forms of assessment agency: resistance (purposeful non-completion, task avoidance), subversion (cheating, manipulation), and contention (rejecting or challenging feedback). Students' justifications show that in particular contexts (e.g. when students fear recourse from the teacher, system, parents, or peers for poor performance) or when focusing on well-being goals, it may be rational to cheat, underperform, or avoid help and feedback.                                                                                                                                                                                                                                                                                                  |
| Five AfL strategies                             | Hawe & Dixon (2017)           | Undergraduate, teacher prep         | 9; 5 interviews      | Qualitative: interviews & artefacts                                 | Cognition                        | Self, Peer, Teacher1,2      | Goals helped students know where they were going; exemplars provided insights into what was expected and constituted quality work; activities elicited evidence of learning; dialogic interactions generated feedback about understandings and progress; exemplars developed evaluative knowledge and skill; peer feedback provided context for evaluation and monitoring of work. The impact of AfL as a catalyst for SRL was realised in the cumulative, recursive effect of the five strategies.                                                                                                                                                                                                                                                                                    |
| AfL                                             | Heritage (2018)               | Primary, poetry                     | 1T 1S                | Qualitative: videotaped observation                                 | Cognition & Motivation           | Teacher 1,2,3,4             | Student's SRL and agency was supported through a temporary process of co-regulation between teacher and student in the context of AfL.                                                                                                                                                                                                                                                                                                                                                                                                                                                                                                                                                                                                                                                 |
| Web-based peer assessment                       | Hsia et al. (2016)            | Secondary, theater                  | 73/90                | Quasi-experiment                                                    | Cognition & Motivation           | Peer1,2                     | Web-based peer assessment was related to improvements in students' performance, self-efficacy and intrinsic motivation for online peer feedback, and satisfaction with learning activity.                                                                                                                                                                                                                                                                                                                                                                                                                                                                                                                                                                                              |
| Peer assessment                                 | Ibarra-Sáiz et al. (2020)     | Undergraduate, project management   | 301                  | Survey                                                              | Cognition                        | Peer 2,3                    | Predictive model of competence development based on key variables of peer assessment: participation, evaluative judgment, feedback. and self-regulation (operationalized as analyzing own and others' work, learning from mistakes, and how to help others). Evaluative judgment involved trust in one's own judgement and in judgment of others. Evaluative judgement and participation directly related to perceptions of the quality of the peer assessment. A positive relationship between participation, evaluative judgment, self-regulation and feedback with competence development, with feedback, self-regulation, and quality of evaluation as mediators.                                                                                                                  |
| Kahoot! as formative assessment                 | Ismal et al. (2019)           | Higher ed, medical                  | 36                   | Focus groups                                                        | Motivation                       | Tech2                       | Study evaluated the use of Kahoot! as a formative assessment tool. When formative quizzes had been offered to medical students previously, more than half did not participate. Focus group results showed Kahoot! sessions motivated students to study, to determine the subject matter that needed to be studied, and to be aware of what they had learned.                                                                                                                                                                                                                                                                                                                                                                                                                           |
| Peer feedback                                   | Joh (2019)                    | Undergraduate, TEFL                 | 52                   | Survey & interview                                                  | Motivation                       | Peer2                       | At the end of semester, participants rated effects of peer feedback on grasp of learning materials, motivation to learn, active involvement in class, and learning achievement more highly than at its start. Extrovert/introvert differences existed before but not after. An effect of previous experience with peer feedback existed both pre and post semester on perceived benefits of peer feedback on learning. Interviewed participants discussed perceptions in terms of their own motivation to learn from peer feedback.                                                                                                                                                                                                                                                    |
| Metacognitive feedback                          | Karaoglan & Yilmaz (2020)     | Undergraduate, computing            | 39/42                | Experiment                                                          | Motivation                       | Teacher2, Tech2             | Providing learning-analytics-based metacognitive feedback was effective in reducing the perception of transactional distance (perceptions of student-student, student-teacher, and student-content interaction distances) and in increasing student motivation.                                                                                                                                                                                                                                                                                                                                                                                                                                                                                                                        |
| Higher stakes & standards, lower resit standard | Kickert et al. (2019)         | Undergraduate, statistics           | 51/150               | Quasi-experiment                                                    | Cognition & Motivation           | Teacher1,2                  | Under high-standards policy, students had significantly higher minimum grade goals, performance self-efficacy/expected grade, task value, time and study environment management, and test anxiety , but no significant differences in aimed grade goals, academic self-efficacy or effort regulation.                                                                                                                                                                                                                                                                                                                                                                                                                                                                                  |
| Performance feedback & summative assessment     | Koenka (2020)                 | Secondary, science & math           | 161                  | Cluster-randomized experiment                                       | Motivation                       | Teacher2                    | Results revealed complex interactions between feedback stage (anticipation of grade vs. receipt of grade) and form (grades, comments, grades and comments, no feedback). Students in the grades-and-comments condition experienced the most optimal effects (increased mastery goal orientation and intrinsic motivation) despite a decline in self-efficacy. Students in the comments condition experienced a similar increase in intrinsic motivation. Students in the no feedback condition reported a heightened performance-approach goal orientation when they received assessments with no feedback.                                                                                                                                                                            |
| Grades, comments, performance feedback          | Koenka et al. (2019)          | Primary & secondary                 | 41 studies & 258 ESs | Meta-analysis                                                       | Cognition & Motivation           | Teacher2                    | Grades positively associated with achievement but negatively associated with motivation compared to no feedback. Compared to those who received comments, students receiving grades had poorer achievement and less optimal motivation. Moderator analyses suggested overall effects varied as a function of the type of motivation (specific construct, internal vs. external motivation), context (academic subject; comment type), student characteristics (achievement level), and methodology (grade anticipation versus receipt).                                                                                                                                                                                                                                                |
| Progress or distance performance feedback       | Lee (2016)                    | Undergraduate                       | 73/73                | Experiment 2x2                                                      | Cognition & Motivation           | Tech2                       | Interaction effects of goal importance and type of performance feedback (progress or distance) on self-regulation and task achievement. High-goal importance groups with distance feedback showed higher goal setting, effort investment, task enjoyment, task completion, task scores than those who received progress feedback. Low- goal importance groups benefited from progress feedback.                                                                                                                                                                                                                                                                                                                                                                                        |
| Self-assessment                                 | Lerdpornkulrat et al. (2019)  | Undergraduate, information literacy | 263/321              | Quasi-experiment                                                    | Motivation & Behavior            | Self2                       | Whether with a rubric (experimental group) or without one (control group), students' motivation, self-efficacy, information-seeking and goal orientation improved. However, there were significant differences between the groups in terms of changes in self-efficacy beliefs.                                                                                                                                                                                                                                                                                                                                                                                                                                                                                                        |

|                                                                     |                              |                                              |                                           |                                                         |                                   |                       |                                                                                                                                                                                                                                                                                                                                                                                                                                                                                                                                                                                |
|---------------------------------------------------------------------|------------------------------|----------------------------------------------|-------------------------------------------|---------------------------------------------------------|-----------------------------------|-----------------------|--------------------------------------------------------------------------------------------------------------------------------------------------------------------------------------------------------------------------------------------------------------------------------------------------------------------------------------------------------------------------------------------------------------------------------------------------------------------------------------------------------------------------------------------------------------------------------|
| Peer & self-assessment                                              | Lin (2018)                   | Undergraduate, management information system | 43/41                                     | Quasi-experiment                                        | Cognition, Motivation & Behavior  | Self2, Peer2          | Group awareness revealed collaborative behavior of group members to regulate their participation; peer assessment appraised members' contribution to encourage individual responsibility and refine regulatory strategies. Classes that engaged in group awareness and peer assessment had moderately lower free-rider behavior, and enhanced socially-shared regulation and individual SRL (particularly goal setting, help seeking, and self-evaluation), compared with the control group. Perceived SSRL level predicted individual SRL.                                    |
| Automatic formative feedback                                        | Llorens et al. (2016)        | Secondary                                    | Study 1: 50/41/41; Study 2: 37/37/38      | Experiment                                              | Cognition & Behavior              | Tech2                 | Software enabled students to read and answer MC comprehension questions while receiving feedback about performance and strategic decisions. Experiment 1 tested two feedback procedures. The most effective procedure forced students to select relevant text information to answer each question and provided feedback based on that selection. Experiment 2 disentangled the role played by the selection task from the feedback provided. Both components contributed to transfer of strategic decisions, but feedback was necessary for improvements to performance.       |
| Portfolio                                                           | Mak & Wong (2018)            | Secondary, writing                           | 2 Ts, 69 Ss                               | Case study                                              | Cognition & Motivation            | Teacher1,2; Peer2     | By establishing an objective through goal-setting, students had a heightened awareness of what to strive for, which motivated them to exert effort. Students reported goal-setting, keeping an error log, self- and peer assessment prompted self-evaluation and monitoring. They perceived themselves as independent learners who enjoy taking responsibility in handling feedback and are more willing to undergo critical self-reflection.                                                                                                                                  |
| Metacognitive monitoring support                                    | Maras et al. (2019)          | Secondary, math                              | 40 Ss w/ASD:(21/19; 95 typical Ss (46/49) | Experiment                                              | Cognition                         | Tech2                 | Secondary school children with autism spectrum disorder (ASD) and typically developing (TD) learners used computer-based Maths Challenge with or without metacognitive monitoring support regarding accuracy of answers, goal reminders and strategy support. Learners with ASD showed less consistency between pre- and post-test intentions to try hard, and benefited from metacognitive support. The Group × Condition interaction was not significant, but support appeared to be less effective for TD. Support significantly improved task performance for both groups. |
| Written reflection                                                  | Martin et al. (2017)         | Primary, math                                | 18                                        | Case study                                              | Cognition                         | Self4                 | Findings show most students were able to accurately self-evaluate their problem-solving skills. Teachers used student reflections to begin conferring with a student for further clarification. The written reflections aided in instructional decisions and increased individual instruction when needed.                                                                                                                                                                                                                                                                     |
| Peer & self-assessment                                              | Meusen-Beekman et al. (2016) | Primary, writing                             | 231/185/279                               | Experiment                                              | Cognition & Motivation            | Self2,Teacher2, Peer2 | Students developed SRL and intrinsic motivation in both peer assessment and self-assessment interventions, compared to control. No significant differences between the peer and self-assessment interventions concerning self-regulation, motivation, or self-efficacy.                                                                                                                                                                                                                                                                                                        |
| Rubric & self-assessment                                            | Miihkinen & Virtanen (2018)  | Undergraduate, accounting                    | 64                                        | Survey                                                  | Cognition & Motivation            | Teacher1              | A rubric had a positive association with students' understanding, self-assessment, confidence, and social and academic integration with teachers and peers.                                                                                                                                                                                                                                                                                                                                                                                                                    |
| Online peer assessment                                              | Money penny et al. (2018)    | Undergraduate                                | 110                                       | Survey                                                  | Motivation                        | Peer2                 | Students generally believed peer review to be effective, helpful to learning, increasing communication skills, and contributing to a stronger written product. Students agreed that peer review increases interaction, participation, and sense of community. Female students were more intimidated by giving peer reviews than their male classmates, but less intimidated online compared to face-to-face. More experienced students and students farther along in their college careers were less likely to give peer reviews that were affected by the ones they received. |
| Automated feedback                                                  | Moore & MacArthur (2016)     | Secondary, writing                           | 6                                         | Think-aloud, interview, trace data analysis             | Cognition, Motivation, & Behavior | Tech2                 | Students who received scores perceived as low used automated essay evaluation feedback to prompt non-surface revisions; students with high scores did not. Students who used feedback made more overall non-surface revisions, revised for different reasons, made more t-unit level revisions, and had more revisions rated as major successes than students who did not use the feedback. However, understanding of the feedback varied. Knowing they would receive a score prompted extensive revising prior to submitting their writing for scoring.                       |
| Feedback                                                            | Muñoz & Cruz (2016)          | Pre-K                                        | 6 T, 6/6/6 Ss                             | Quasi-experiment, cross-section                         | Cognition                         | Teacher2              | A greater number of metacognitive control events were displayed by preschoolers who received self-regulation feedback: in total number of events and in number of events representing each of the three dimensions of metacognitive control (planning, monitoring and evaluation).                                                                                                                                                                                                                                                                                             |
| Reflection on grade estimates                                       | Nederhand et al. (2020)      | Secondary, French                            | 73/78/66                                  | Longitudinal quasi-experiment                           | Cognition                         | Self4                 | Students provided grade estimates after each exam. Groups of students either just received their grade, had to calculate the difference between their estimate and the actual grade, or also had to reflect on reasons for a mismatch. Improvements in calibration accuracy were seen when students estimated their grade after each exam, regardless of level of reflection support. Students in the reflection group became more confident in their performance estimates.                                                                                                   |
| Self-assessment (paper, computer, and mobile-based)                 | Nikou & Economides (2016)    | Secondary, physics                           | 23/21/22                                  | Quasi-experiment                                        | Cognition & Motivation            | Teacher2, Tech2       | Students' overall motivation, learning performance, and confidence increased in both computer- and mobile-based assessment.                                                                                                                                                                                                                                                                                                                                                                                                                                                    |
| Self-assessment; performance estimates, mental effort ratings, JOLs | Nugteren et al. (2018)       | Secondary, genetics                          | 15                                        | Descriptive, exploratory                                | Cognition                         | Self2,3               | Study of how students select learning tasks and role of performance estimates, mental effort ratings, and JOLs. Students based most task selections on content: very few took difficulty level, support level, and content of task into account. Performance was often overestimated and rarely changed over time. Performance estimates increased slightly; mental effort ratings decreased. Students based task selection decisions on inaccurate self-assessments.                                                                                                          |
| Online feedback                                                     | Pan & Shao (2020)            | Undergraduate, English                       | 312                                       | Survey                                                  | Motivation & Behavior             | Teacher2              | Teacher online feedback was positively related to both learning motivation and learning engagement. The positive effect of the feedback on learning motivation was partially mediated by learning engagement.                                                                                                                                                                                                                                                                                                                                                                  |
| Self-assessment                                                     | Panadero et al. (2020)       | Secondary, Spanish & mathematics             | Spanish: 64/63; Math: 64/63               | Cross-sectional 2x2, think-alouds, observations, survey | Cognition, Motivation             | Teacher1,2            | After receiving feedback, students' use of self-assessment strategies and criteria decreased severely: Using feedback became the main strategy and criteria. More strategies used for Spanish and a wider range of criteria for mathematics. Students across levels used different strategies and criteria. Females used more strategies and types of strategies.                                                                                                                                                                                                              |
| Self-assessment                                                     | Panadero et al. (2017)       | Primary, secondary, higher ed                | 19 studies, 48 ESs                        | Meta-analysis                                           | Cognition & Motivation            | Self2                 | A small, positive effect of self-assessment on SRL and self-efficacy. Gender (with girls benefiting more) and certain self-assessment components (such as self-monitoring) were significant moderators of the effects on self efficacy.                                                                                                                                                                                                                                                                                                                                        |
| Feedback                                                            | Pereira et al. (2016)        | Undergraduate                                | 605                                       | Survey                                                  | Cognition                         | Teacher1              | Feedback was perceived as more relevant, effective and in a more positive way by students who were assessed by learner-centred methods (e.g. portfolios, project work in teams) than by those assessed by traditional methods (e.g. tests, examinations). Participants who were assessed by learner-centred or mixed methods perceived feedback as more effective in all phases of SRL than students who were assessed by traditional methods.                                                                                                                                 |
| Self-assessment accuracy feedback                                   | Raaijmakers et al. (2019)    | Secondary                                    | 37/34/37                                  | Quasi-experiment                                        | Cognition                         | Tech2                 | Experiment 1 showed that self-assessment feedback led to less accurate self-assessments. Experiment 2 included feedback on self-assessment accuracy plus correct answers, or feedback on accuracy plus correct answers and opportunities to contrast with students' own answers. Again, no beneficial effect on accuracy.                                                                                                                                                                                                                                                      |
| Self-assessment of exam performance                                 | Rivers et al. (2019)         | Undergraduate, psychology                    | Study 1:403 Study 2: 69                   | Descriptive                                             | Cognition                         | Self4                 | Postdictive learning judgments were slightly more accurate than predictive judgments, indicating students made better formative evaluations after an exam. However, postdiction accuracy was low, and in second study, pre/post accuracy did not differ. Students adequately monitored performance for individual questions and classified each question with respect to the topic that it assessed.                                                                                                                                                                           |
| Video feedback                                                      | Roure et al. (2019)          | Secondary, physical education                | 92/139/130                                | Quasi-experiment                                        | Motivation                        | Self1                 | Situational interest increased with the use of video feedback (teachers commented on student-made videos) compared with either teacher feedback (no video) or student-made videos (no teacher feedback). However, no differences were found between the teacher feedabck and student-made video group. The video and teacher feedback group received higher scores for total interest, instant enjoyment, exporation intention, and attention demand, and lower scores for novelty and challenge.                                                                              |
| Peer & teacher feedback                                             | Ruegg (2018)                 | Undergraduate, writing                       | 30/37                                     | Quasi-experiment                                        | Motivation                        | Teacher2, Peer2       | Study compared changes in self-efficacy over one academic year. One group received teacher feedback on every preliminary draft while the other group gave and received peer feedback on every preliminary draft. The teacher feedback group increased in writing self-efficacy significantly more than the peer feedback group. Confidence in all four investigated aspects of writing (organisation, support, grammar and overall writing ability) increased significantly.                                                                                                   |
| Reflection via digital learning diary                               | Saks & Leijen (2019)         | Undergraduate, EFL                           | 28                                        | Descriptive                                             | Cognition                         | Self1,4               | Learning diaries guided self-critical analysis of learning processes, and showed growth in description, evaluation, justification, dialogue, and transfer, particularly evaluation and justification, from beginning to end of course.                                                                                                                                                                                                                                                                                                                                         |

|                                          |                               |                                            |                                                                   |                                        |                                   |                              |                                                                                                                                                                                                                                                                                                                                                                                                                                                                                                                                                                                                            |
|------------------------------------------|-------------------------------|--------------------------------------------|-------------------------------------------------------------------|----------------------------------------|-----------------------------------|------------------------------|------------------------------------------------------------------------------------------------------------------------------------------------------------------------------------------------------------------------------------------------------------------------------------------------------------------------------------------------------------------------------------------------------------------------------------------------------------------------------------------------------------------------------------------------------------------------------------------------------------|
| Online emotional & motivational feedback | Sarsar (2017)                 | Undergraduate, instructional technology    | 15                                                                | Single case; surveys, artifacts        | Motivation                        | Teach2                       | Emotional Motivational Feedback Messages (word choices, font effects, and emoticons in teacher feedback) helped to increase and maintain students' motivation. Students liked the messages and the style of the instructor's teaching by giving emotional motivational feedback. Students had a closer and friendlier relationship with the instructor; they also started to use more emotional content themselves.                                                                                                                                                                                        |
| Peer feedback                            | Schünemann et al. (2017)      | Primary, reading                           | 91/76                                                             | Quasi-experiment                       | Cognition                         | Peer2                        | Students practiced a strategic approach to reading in a Reciprocal Teaching (RT) or RT + SRL (planning, monitoring, and evaluating the learning process) condition. Engaging small groups in self-regulatory activities led to increased task-oriented teamwork and improved feedback quality. Type of treatment had an indirect effect on strategy-related task performance and reading comprehension through feedback quality.                                                                                                                                                                           |
| Low-stakes                               | Schut et al. (2020)           | Undergraduate & graduate, programmatic     | 26                                                                | Qualitative                            | Motivation                        | Teacher1,2                   | Study showed a strong relation between learners' perceptions of the teacher–learner relationship and their assessment task perception. Two important sources for perception of teachers' agency: positional and expert agency. High levels of teacher warmth or friendliness were positively associated with perception of assessment for learning, in particular when teachers' agency was less dominantly exercised. When teachers exercised these sources of agency dominantly, learners felt inferior to them.                                                                                         |
| Automatic assessment                     | Seifried et al. (2016)        | Undergraduate, educational psychology      | 300                                                               | Quasi-experiment, 2x2                  | Cognition & Motivation            | Teacher2, Tech2              | Students' assumed source of feedback influenced their acceptance of assessments. Students were more positive towards the assumed teaching assistants' assessments. Assumed or real source of assessment had no negative effect on students' motivation, achievement aspirations, and perceived knowledge. A general decline of motivation over time was significant for all variables except for their judgment of their learning, and did not differ by source of the scoring.                                                                                                                            |
| E-portfolio                              | Sharifi et al. (2017)         | Undergraduate, English                     | 33/33                                                             | Quasi-experiment                       | Cognition & Motivation            | Teacher1                     | The e-portfolio group outperformed traditional assessment group in terms of vocabulary learning on the posttest, motivation for learning, and perceived benefits of integration of technology and educational activities.                                                                                                                                                                                                                                                                                                                                                                                  |
| Automated feedback                       | Tapingkae et al. (2020)       | Secondary, digital citizenship             | 60/55                                                             | Quasi-experiment, survey               | Cognition & Motivation            | Tech2                        | A digital contextual gaming approach with formative assessment was associated with decreases in self-reported online harassment victimization and perpetration, and improved intrinsic motivation, goal orientation motivation, self-determination motivation, and self-efficacy, and technology acceptance perceptions.                                                                                                                                                                                                                                                                                   |
| Peer evaluation                          | Tavoletti et al. (2019)       | Undergraduate, business                    | 5682                                                              | Quasi-experiment, no control           | Cognition & Motivation & Behavior | Peer2                        | When peers evaluated team members' contributions to their virtual teams during project work, teams showed higher levels of group effort, lower levels of average productivity and motivation, and no clear evidence of improved team performance. Negative social dynamics offset increased effort of the group.                                                                                                                                                                                                                                                                                           |
| Feedback                                 | Thibodeaux & Harapnuik (2020) | Graduate, education                        | 47                                                                | Survey & focus group                   | Cognition                         | Teacher2                     | Studied how students use feedback. Students preferred mixed modalities of feedback and appreciated feedback that helped achieve learning goals. Learning environments that encourage learner choice, ownership, and voice through authentic learning opportunities seen as optimal for students to understand and be receptive to feedback, have dialogue with instructors, and use feedback to become self-regulated, independent, deep learners.                                                                                                                                                         |
| Exam wrappers                            | Trogden & Royal (2019)        | Undergraduate, chemistry, math, statistics | Calculus: 83, Chemistry, Statistic: 32, Organic chemistry: 26/247 | Descriptive                            | Cognition                         | Self4                        | Exam wrappers related to students having more accurate beliefs about study behavior and content mastery. Students' responses on final exam wrapper were less general, had more specific behavioral changes, and more growth mindset language. Student metacognitive success improved, as measured through the quadrant analysis, MAI, and qualitative analysis.                                                                                                                                                                                                                                            |
| Frequent summative assessment            | Vaessen et al. (2017)         | Undergraduate, statistics                  | 219                                                               | Survey                                 | Motivation                        | Self4,Teacher2               | Most students valued frequent graded assessments as a study motivator. A modest number of students experienced positive or negative effects from assessments and grades received. Less than half of students used the results of frequent assessments in their learning process. Perceived value of the frequent assessments and the perception of positive effects positively mediated the relation between grades and intrinsic motivation, whereas the perception of negative effects (lower self-confidence and more stress) negatively mediated the relation between grades and intrinsic motivation. |
| Full-definition and idea-unit feedback   | Van Loon & Roebbers (2017)    | Primary, ?                                 | 100                                                               | Experiment                             | Cognition                         | Teacher2                     | Both full-definition and idea-unit feedback standards strongly improved 4th and 6th graders' self-evaluations for commission errors and partially correct responses. Restudy selections before feedback were more adaptive for 6th than 4th graders but age differences disappeared after feedback. Global as well as item-specific self-evaluations became more accurate and less overconfident when children could compare test responses with either feedback standard. Although feedback had no overall effect on number of items selected for restudy, restudy selections became more strategic.      |
| Learning goals, feedback                 | Vattøy & Smith (2019)         | Secondary, EFL                             | 1137                                                              | Survey                                 | Cognition & Motivation            | Teacher2                     | Students who were aware of learning goals perceived of teachers' feedback as more useful. Path analyses suggested that students' perceived self-efficacy and EFL teaching positively predicted perceptions of teacher feedback practice when mediated by perceived external goal orientation and self-regulation.                                                                                                                                                                                                                                                                                          |
| Reflective diary                         | Wallin & Adawi (2018)         | Graduate, tissue engineering               | 4                                                                 | Case study                             | Cognition                         | Self4                        | Study of reflective diaries for formative assessment of three aspects of SRL: conceptions of knowledge, conceptions of learning, and strategies for monitoring and regulating learning. Analyses indicate that reflective diaries enable assessment of all three aspects of SRL.                                                                                                                                                                                                                                                                                                                           |
| Self-assessment with rubric              | Wang (2017)                   | Undergraduate, ESL writing                 | 80                                                                | Qualitative, journal & interview       | Cognition                         | Self2,4                      | Students perceived the rubric as useful for fostering self-regulation by guiding them in goal-setting, planning, self-monitoring and reflection. Both within-rubric (coverage and structure of the rubric, performance level descriptors, score range) and rubric-user (knowledge about writing) factors affected perceived effectiveness of the rubric for self-assessment.                                                                                                                                                                                                                               |
| Grades                                   | Weidinger et al. (2017)       | Primary,math                               | 542                                                               | Longitudinal, survey                   | Motivation                        | Teacher4                     | Latent growth curve models showed differences in trajectories of intrinsic motivation across students rather than uniform development. Moreover, students' trajectories of grades and intrinsic motivation were only weakly associated. A latent cross-lagged model revealed that reciprocal effects between the two constructs over time were small at best (essentially zero). Results indicate that negative performance feedback in the form of grades does not necessarily lead to a decrease in intrinsic motivation.                                                                                |
| Performance feedback                     | Weidinger et al. (2016)       | Undergraduate, numerical task              | Exp1:51/50<br>Exp2: 45/45                                         | Experiment 2 × 2                       | Cognition & Motivation            | Teacher2                     | Students' ability self-concept (ASC) as well as their intrinsic motivation (IM) declined after negative performance feedback. The effect of feedback on change in IM—while controlling for actual task performance—was fully mediated by students' ASC. Change in IM was not caused by a general change in affect after receiving good or bad feedback. Students' learning-approach and performance-approach goals did not moderate the relation between ASC and IM.                                                                                                                                       |
| Self-assessment with rubric              | Wollenschläger et al. (2016)  | Secondary, science                         | 40/40/40                                                          | Pre-post experiment                    | Cognition & Motivation            | Teacher2                     | Students who received improvement information showed a significantly better performance in planning scientific experiments, perceived themselves as being more competent, and were also more accurate in their self-evaluative performance judgments. Calibration accuracy could be identified to be a partial mediator of the positive effect of rubric feedback on performance.                                                                                                                                                                                                                          |
| Formative use of summative tests         | Xiao (2017)                   | Secondary, English                         | 3T 180S                                                           | Observations & interviews              | Cognition, Behavior               | Self4, Teacher4              | Study of formative uses of tests in a test-dominated context. Three test follow-up strategies were identified: teachers explaining test items, individual teacher-student conferences, and student follow-up actions to address weaknesses. Students were more likely to take action when the teacher focused them on taking control of their own learning.                                                                                                                                                                                                                                                |
| Formative feedback, quizzes, exemplars   | Xiao & Yang (2019)            | Secondary, English                         | 2T 16S                                                            | Qualitative, observations & interviews | Cognition                         | Teacher2                     | Teachers and students perceived the role of formative assessment in self-regulation to include understanding and setting learning goals, adopting strategies to achieve goals, managing resources, extending effort, responding to feedback, and producing products. Feedback at the process and self-regulation levels were most effective; enabled students to take action to improve learning such as understanding standards, self-diagnosing, planning, reflecting, seeking information, and conducting remedial activities.                                                                          |
| Self-assessment, teacher & peer feedback | Yan (2020)                    | Graduate, teacher education                | 63                                                                | Survey                                 | Cognition                         | Self1,2,3,4, Teacher2, Peer2 | Study of characteristics of self-assessment practices at three SRL phases and relationships with academic achievement. Self-assessment was ongoing across Preparatory, Performance, and Appraisal phases, but less during Appraisal. Self-directed feedback seeking through monitoring at Performance phase was the strongest and positive predictor of achievement. Achievement had negative impact on self-assessment actions at Appraisal phase.                                                                                                                                                        |
| Self-assessment                          | Yan et al. (2020)             | Secondary, integrated humanities           | 37/37                                                             | Quasi-experiment, focus group          | Cognition & Motivation            | Self2                        | Self-assessment diaries were positively associated with academic achievement, self-efficacy, and intrinsic value. Students with lower past achievement benefited more than other students in intervention group. No significant relationships between intervention and self-and effort-reflection. Effort-regulation, self-reflection, self-efficacy, and intrinsic value did not mediate the link between self-assessment diaries and academic achievement.                                                                                                                                               |
| Reflective                               | Yang (2019)                   | Secondary, visual arts                     | 33/33                                                             | Quasi-experiment                       | Cognition                         | Self4, Tech2                 | Study of reflective assessment, an analytic tool used in the knowledge-building community context to help low achievers develop epistemic agency. Reflective assessment encouraged low achievers to set knowledge-building goals, collectively and continuously analyse and reflect on their inquiry and ideas, and generate actions to address identified gaps, thus helping them engage in high-level epistemic agency, as compared to comparison group.                                                                                                                                                 |

|                                              |                        |                              |             |                                                |                        |                           |                                                                                                                                                                                                                                                                                                                                                                                                                                                                                                                        |
|----------------------------------------------|------------------------|------------------------------|-------------|------------------------------------------------|------------------------|---------------------------|------------------------------------------------------------------------------------------------------------------------------------------------------------------------------------------------------------------------------------------------------------------------------------------------------------------------------------------------------------------------------------------------------------------------------------------------------------------------------------------------------------------------|
| Reflective                                   | Yang et al. (2020)     | Undergraduate, science       | 40/33       | Quasi-experiment                               | Cognition              | Tech2, Peer2, Self4       | Analytics-supported collective reflective assessment (AsCRA) helped students develop high-level shared epistemic agency in the knowledge building process. AsCRA helped students focus on high-level goals (idea negotiation, synthesis of ideas and rise above thinking), and to engage in continuous assessment, reflection, and action planning to regulate and improve their discourse.                                                                                                                            |
| Online student-created feedback              | Yu et al. (2018)       | Secondary, Chinese           | 55/54       | Quasi-experiment, non-equivalent control group | Motivation             | Self2                     | Students who wrote multiple choice questions and feedback on each choice for an online student-created questions increased in learning motivation and in positive academic emotions in the subject matter being learned, compared to students who created online questions alone. The feedback-creation task was not found to increase middle school students' negative academic emotions toward the learned subject, despite the added workload and complex nature of the task.                                       |
| Error detection with self-assessment scripts | Zamora et al. (2018)   | Secondary, science           | 47/68/83    | Quasi-experiment                               | Cognition              | Self2,3,4                 | Students who conducted error detection and then formulated and completed self-regulation activities achieved better performance. Error detection and self-assessment accuracy improved with use of scripts. Self-regulation task selection was not correlated with achievement.                                                                                                                                                                                                                                        |
| Self & peer assessment & feedback            | Zhang & Wenxiao (2017) | Secondary                    | 12 T. 630 S | Survey & interview                             | Cognition & Motivation | Self2, Teacher1,2, Peer 2 | Self-assessment was most positively related to SRL, followed by teacher instruction and structured guidance, then teacher feedback. Assessment tasks and student choice had mixed associations. Peer assessment and classroom assessment environment negatively associated with SRL.                                                                                                                                                                                                                                   |
| Online peer assessment                       | Zheng et al. (2018)    | Undergraduate, writing       | 34/34       | Quasi-experiment                               | Cognition & Motivation | Peer2                     | Synchronous discussion was positively related to students' writing performance, especially content writing skills, affective and metacognitive feedback quality, metacognitive awareness and self-efficacy.                                                                                                                                                                                                                                                                                                            |
| Feedback                                     | Zhu & Mok (2018)       | Primary, math                | 2972        | Survey                                         | Cognition & Behavior   | Self1, Teacher2           | Study of the prediction of students' SRL (planning, monitoring, and adaptive reactions) using prior achievement, interest in mathematics, personal best goal orientation (PBGO), and perceptions of frequency and usefulness of teachers' feedback one academic year earlier. PBGO had a direct effect on adaptive reactions; interest in mathematics did not. The effect of perceived usefulness of teacher feedback was weak; the perceived frequency of teacher feedback on adaptive reactions was not significant. |
| Feedback                                     | Zumbrunn et al. (2016) | Primary & secondary, writing | 598         | Survey                                         | Cognition & Motivation | Teacher2                  | Students' perceptions of feedback partially mediated the relationship between writing self-efficacy and writing self-regulation aptitude.                                                                                                                                                                                                                                                                                                                                                                              |
